# Supplementary material for: Emergent ultrasmall multiferroics in paraelectric perovskite oxide by hole polarons
Source: Royal Society of Chemistry journal article supplement (doi:10.1039/d3cp05364d), 2023-12-05
Supplement: d3cp05364d1.pdf [file d3cp05364d1.pdf]

## Supporting Information for

### Emergent ultrascale multiferroics in paraelectric perovskite oxide by hole

#### polarons

Tao Xu\*, Masataka Mori, Hiroyuki Hirakata, Takayuki Kitamura, Takahiro Shimada\*

*Department of Mechanical Engineering and Science, Kyoto University, Nishikyo-ku, Kyoto 615-8540, Japan*

\*Corresponding authors: [xu.tao.44a@st.kyoto-u.ac.jp](mailto:xu.tao.44a@st.kyoto-u.ac.jp); [shimada@me.kyoto-u.ac.jp](mailto:shimada@me.kyoto-u.ac.jp)

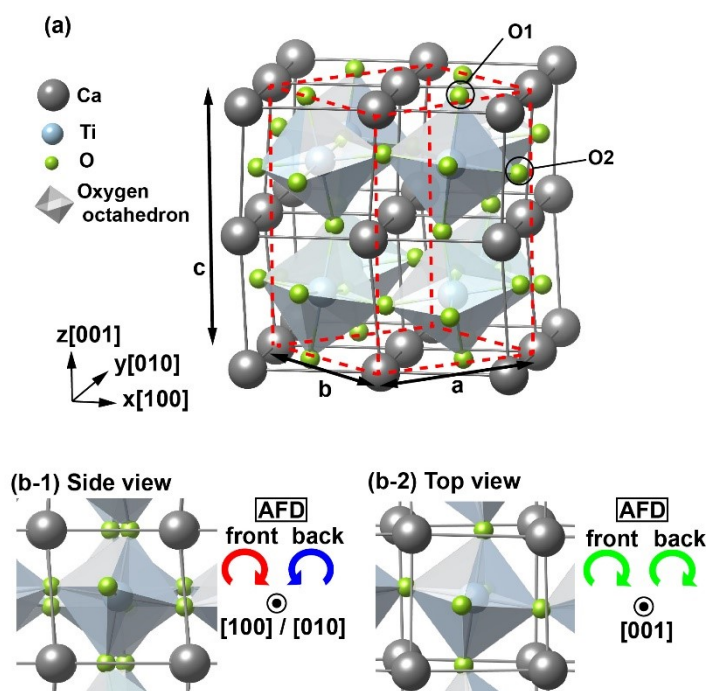

**Fig. S1.** (a) Crystal structure of orthorhombic  $\text{CaTiO}_3$ . The red dot box indicates the primitive cell. (b-1)(b-2) AFD displacement exist in this structure. The arrows indicate AFD displacement around each axis.

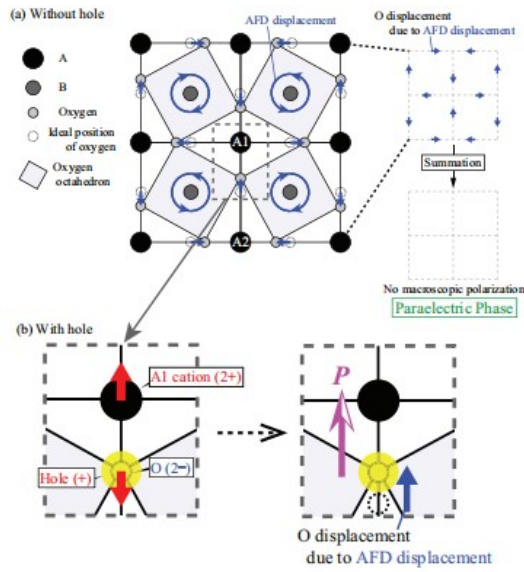

**Fig. S2.** (a) Schematic diagram of perovskite  $ABO_3$ , which has uniaxial AFD displacement. Blue arrows indicate the displacement of O atoms due to AFD displacement. (b) Schematic diagram of  $ABO_3$  with hole polaron (yellow area). The red arrows indicate the displacement of Al and O atoms due to the localization of hole. The pink and blue arrows indicate the direction of polarization and the displacement of O atom due to AFD displacement, respectively.

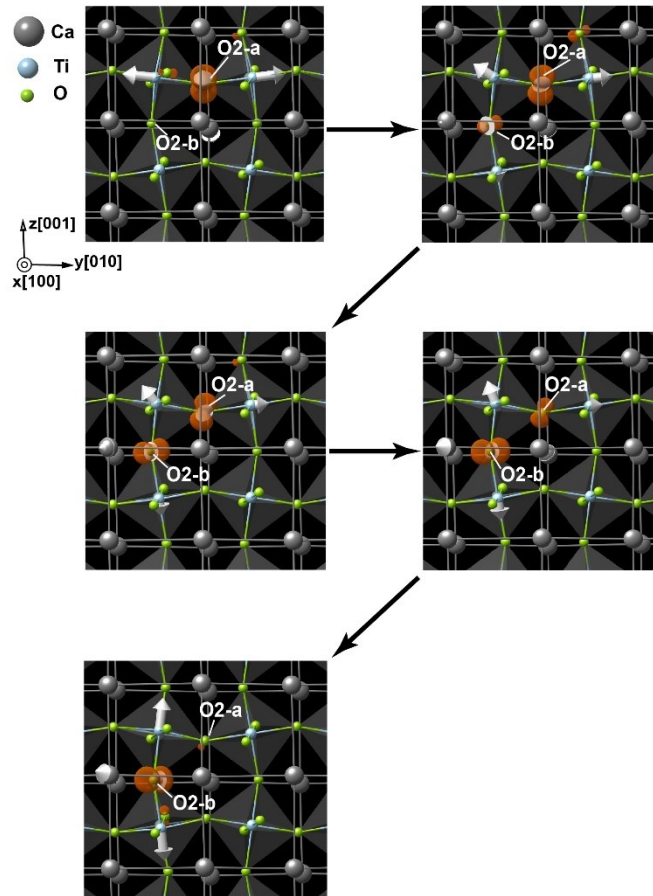

**Fig. S3.** The evolution of the squared wave function of the hole polaron in  $\text{CaTiO}_3$  along the migration pathway. The yellow area represents the iso-surface of charge densities of  $0.02 \text{ \AA}^{-3}$ . White arrows indicate the small displacement of atoms around the hole polaron.

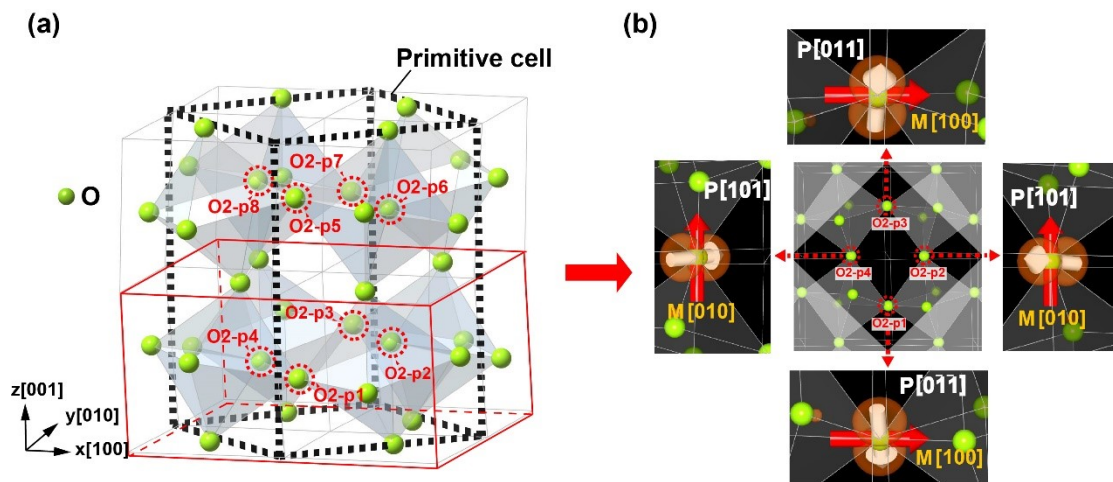

**Fig. S4.** (a)  $\text{O}_2$  atoms in primitive cell (black dot box) of orthorhombic  $\text{CaTiO}_3$ . (b) The direction of polarization (white arrows) and magnetic moment (red arrows) in the case of the hole polaron at each  $\text{O}_2$  atom.

**Table S1.** Band gap  $E_{\text{gap}}$ , lattice parameters  $a$ ,  $b$ , and  $c$  of orthorhombic  $\text{CaTiO}_3$  calculated using HSE06. The experimental values [1,2] are also shown for comparison.

|                       | HSE06 | Exp       |
|-----------------------|-------|-----------|
| $E_{\text{gap}}$ (eV) | 3.86  | 3.8 ~ 4.4 |
| $a$ (Å)               | 5.36  | 5.38      |
| $b$ (Å)               | 5.43  | 5.44      |
| $c$ (Å)               | 7.61  | 7.64      |

**Table S2.** Activation energy  $E_a$  and the hole polaron mobility  $\mu$  for polaronic migration in  $\text{CaTiO}_3$  from initial to the final structure.

| Number of O2                                 | O2-b,d | O2-c,e                |                       |       |
|----------------------------------------------|--------|-----------------------|-----------------------|-------|
| $E_a$ (meV)                                  | 148.0  | 167.0                 |                       |       |
| $\mu(\times 10^{-3})(\text{cm}^2/\text{Vs})$ | 2.52   | 1.19                  |                       |       |
| Number of O1                                 | O1-a   | O1-b                  | O1-c                  | O1-d  |
| $E_a$ (meV)                                  | 151.6  | 250.8                 | 265.5                 | 136.9 |
| $\mu(\times 10^{-3})(\text{cm}^2/\text{Vs})$ | 2.19   | $4.73 \times 10^{-2}$ | $2.69 \times 10^{-2}$ | 3.79  |

## Reference

- [1] A. R. Chakhmouradian, R. H. Mitchell, *J. Solid State Chem.*, 1998, **138**, 272277.  
[2] A. Krause, W. M. Weber, D. Pohl, B. Rellinghaus, A. Kersch, T. Mikolajick, *J. Phys. D: Appl. Phys.*, 2015, **48**, 415304.
